# Supplementary material for: Tumour vasculature immaturity, oxidative damage and systemic inflammation stratify survival of colorectal cancer patients on bevacizumab treatment
Source: PubMed Central journal article supplement (PMC5828217; doi:10.18632/oncotarget.24276), 2018-01-19
Supplement: oncotarget-09-10536-s001.pdf [file oncotarget-09-10536-s001.pdf]

## Tumour vasculature immaturity, oxidative damage and systemic inflammation stratify survival of colorectal cancer patients on bevacizumab treatment

### SUPPLEMENTARY MATERIALS

Supplementary Table 1: Patient demographics

| Patient Demographics               |                   | Tissue Patients (n=80) |            | Serum Patients (n=61) |            |
|------------------------------------|-------------------|------------------------|------------|-----------------------|------------|
| Age (years)                        |                   | 64                     | (25-84)    | 62                    | (29-81)    |
| Overall Survival (months)          |                   | 38                     | (6-140)    | 33                    | (4-61)     |
| PFS (months)                       |                   | 15                     | (1-52)     | 14                    | (1-59)     |
| Gender                             | Male/Female       | 45/35                  | 6:4        | 38/23                 | 6:4        |
|                                    | A                 | 1                      | 1%         | 2                     | 3%         |
| Dukes' Classification at Diagnosis | B                 | 13                     | 16%        | 9                     | 15%        |
|                                    | C                 | 29                     | 36%        | 15                    | 25%        |
|                                    | D                 | 37                     | 46%        | 35                    | 57%        |
| Bevacizumab                        | First Line        | 65                     | 81%        | 53                    | 87%        |
|                                    | Maintenance       | 31                     | 39%        | 23                    | 38%        |
|                                    | Duration (months) | 10.8                   | (0.4-38.4) | 10.1                  | (0.4-41.5) |
| Liver Resection                    |                   | 19                     | 24%        | 12                    | 20%        |
| Complete Remission                 |                   | 10                     | 13%        | 9                     | 15%        |

Patient demographics for tissue (n=80) and serum (n=61) scoring. These are not totally independent cohorts with 22 patients providing both tissue and serum samples of 119 patients in total. Within columns the value to the left indicates the number of patients and to the right is a range, ratio or percentage as appropriate.

Supplementary Table 2: Probability of survival

| Marker       | Above Median | Below Median |
|--------------|--------------|--------------|
| % IMM        | 0.35         | 0.09         |
| 8-oxo-dG ENI | 0.41         | 0.13         |
| 8-oxo-dG ECI | 0.27         | 0.21         |
| IL6          | 0.12         | 0.36         |
| IL8          | 0.13         | 0.36         |

Probability of survival at 60 months or last observation.

**Supplementary Table 3: Outputs of statistical analyses for serum levels of angiogenic factors, oxidative damage markers and inflammatory cytokine levels indicate that IL6 stratifies Progression Free Survival (PFS) rates**

| Biological Process | Serum Marker  | n  | Above Median | Raw Univariate p-value | Adjusted p-value | Lasso Coefficient |
|--------------------|---------------|----|--------------|------------------------|------------------|-------------------|
| Angiogenic Factors | VEGF-A        |    | 0.34         | 0.15                   | 0.26             | -                 |
|                    | PDGF $\beta$  | 61 | 0.89         | 0.40                   | 0.57             | -                 |
|                    | ANG2          |    | 0.57         | 0.59                   | 0.66             | -                 |
|                    | TGF $\beta$ 1 | 57 | 0.87         | 0.53                   | 0.66             | -                 |
| Oxidative Damage   | 8-oxo-dG      | 60 | 0.53         | 0.16                   | 0.26             | -0.09             |
|                    | HEL           |    | 0.65         | 0.86                   | 0.86             | -                 |
| Cytokines          | IL1 $\beta$   |    | 0.43         | 0.07                   | 0.17             | -                 |
|                    | <b>IL6</b>    | 61 | <b>0.02</b>  | <b>0.03</b>            | 0.17             | <b>0.01</b>       |
|                    | IL8           |    | 0.01         | 0.06                   | 0.17             | -                 |
|                    | TNF $\alpha$  |    | 0.51         | 0.04                   | 0.27             | -                 |

The statistical output columns show p-values from a univariate analysis when data is dichotomised into above and below median, p-values from Cox proportional hazards for testing the association between the actual marker versus with changes in survival with both raw univariate p-values and adjusted p-values from a multiple penalised regression analysis and non-zero lasso coefficients from multivariate analysis respectively. p values  $\leq 0.05$  were considered significant and the numbers of patients scored are indicated. IL6 was significant for survival curves, by a raw univariate test and a multivariate test (highlighted in bold).
